# Supplementary material
Source: MDPI journal article supplement (https://www.mdpi.com/2571-8789/7/4/107)
Supplement: s1 [file s1]

Table S1 pH over time (week) in Levin soil and Pukekohe with and without composts. SE is the standard error of the mean (n=3).

| Week          | pH                              |      |      |      |        |      |                               |      |      |      |        |      |                               |      |      |      |        |      |
|---------------|---------------------------------|------|------|------|--------|------|-------------------------------|------|------|------|--------|------|-------------------------------|------|------|------|--------|------|
|               | Municipal compost amended soils |      |      |      |        |      | Sawdust compost amended soils |      |      |      |        |      | No organic matter added soils |      |      |      |        |      |
|               | T-19                            | SE   | T-30 | SE   | T3-0+N | SE   | T-19                          | SE   | T-30 | SE   | T-30+N | SE   | T-19                          | SE   | T-30 | SE   | T-30+N | SE   |
| Levin soil    |                                 |      |      |      |        |      |                               |      |      |      |        |      |                               |      |      |      |        |      |
| 1             | 6.6                             | 0.01 | 6.6  | 0.01 | 6.6    | 0.01 | 6.5                           | 0.01 | 6.5  | 0.01 | 6.5    | 0.03 | 6.7                           | 0.01 | 6.6  | 0.01 | 6.6    | 0.02 |
| 5             | 6.7                             | 0.00 | 6.7  | 0.02 | 6.6    | 0.01 | 6.7                           | 0.01 | 6.8  | 0.00 | 6.7    | 0.03 | 6.7                           | 0.03 | 6.6  | 0.02 | 6.6    | 0.02 |
| 9             | 6.4                             | 0.00 | 6.5  | 0.02 | 6.2    | 0.01 | 6.5                           | 0.01 | 6.5  | 0.01 | 6.2    | 0.01 | 6.4                           | 0.03 | 6.7  | 0.01 | 6.7    | 0.01 |
| 13            | 6.5                             | 0.00 | 6.4  | 0.01 | 6.1    | 0.01 | 6.5                           | 0.00 | 6.5  | 0.00 | 6.1    | 0.01 | 6.5                           | 0.00 | 6.5  | 0.01 | 6.1    | 0.02 |
| 21            | 6.5                             | 0.02 | 6.5  | 0.01 | 6.2    | 0.03 | 6.6                           | 0.02 | 6.5  | 0.02 | 6.4    | 0.07 | 6.5                           | 0.03 | 6.4  | 0.02 | 6.1    | 0.03 |
| 31            | 6.6                             | 0.01 | 6.5  | 0.03 | 6.3    | 0.01 | 6.6                           | 0.01 | 6.5  | 0.01 | 6.4    | 0.01 | 6.6                           | 0.02 | 6.5  | 0.02 | 6.2    | 0.02 |
| 49            | 6.6                             | 0.01 | 6.5  | 0.01 | 6.2    | 0.01 | 6.6                           | 0.02 | 6.5  | 0.02 | 6.2    | 0.01 | 6.6                           | 0.01 | 6.5  | 0.02 | 6.3    | 0.02 |
| Pukekohe soil |                                 |      |      |      |        |      |                               |      |      |      |        |      |                               |      |      |      |        |      |
| 1             | 6.4                             | 0.02 | 6.4  | 0.02 | 6.4    | 0.00 | 6.5                           | 0.02 | 6.5  | 0.01 | 6.5    | 0.02 | 6.2                           | 0.06 | 6.1  | 0.04 | 6.0    | 0.04 |
| 5             | 6.4                             | 0.01 | 6.4  | 0.04 | 6.3    | 0.02 | 6.5                           | 0.02 | 6.4  | 0.03 | 6.4    | 0.03 | 6.5                           | 0.04 | 6.4  | 0.03 | 6.4    | 0.02 |
| 9             | 6.2                             | 0.01 | 5.9  | 0.01 | 5.8    | 0.01 | 6.2                           | 0.01 | 6.0  | 0.02 | 5.8    | 0.01 | 6.2                           | 0.04 | 5.9  | 0.02 | 5.7    | 0.02 |
| 13            | 5.9                             | 0.01 | 5.9  | 0.01 | 5.8    | 0.05 | 6.1                           | 0.01 | 6.0  | 0.01 | 5.7    | 0.02 | 6.0                           | 0.02 | 5.9  | 0.02 | 5.6    | 0.02 |
| 21            | 5.9                             | 0.02 | 5.9  | 0.02 | 5.7    | 0.03 | 6.0                           | 0.02 | 6.0  | 0.02 | 5.7    | 0.02 | 5.9                           | 0.02 | 5.9  | 0.01 | 5.7    | 0.02 |
| 31            | 6.0                             | 0.00 | 5.9  | 0.01 | 5.7    | 0.01 | 6.1                           | 0.01 | 5.9  | 0.00 | 5.8    | 0.01 | 6.0                           | 0.02 | 5.9  | 0.03 | 5.7    | 0.01 |
| 49            | 6.0                             | 0.02 | 5.9  | 0.03 | 5.6    | 0.02 | 6.1                           | 0.01 | 5.9  | 0.00 | 5.7    | 0.03 | 6.0                           | 0.01 | 5.9  | 0.02 | 5.6    | 0.01 |

Table S2. Extractable Al (mg/kg) over time (week) in Levin soil and Pukekohe with and without composts. SE is the standard error of the mean (n=3).

| Week       | Extractable Al (mg/kg)          |       |      |       |        |       |                               |       |      |       |        |       |                               |       |      |       |        |       |
|------------|---------------------------------|-------|------|-------|--------|-------|-------------------------------|-------|------|-------|--------|-------|-------------------------------|-------|------|-------|--------|-------|
|            | Municipal compost amended soils |       |      |       |        |       | Sawdust compost amended soils |       |      |       |        |       | No organic matter added soils |       |      |       |        |       |
|            | T-19                            | SE    | T-30 | SE    | T3-0+N | SE    | T-19                          | SE    | T-30 | SE    | T-30+N | SE    | T-19                          | SE    | T-30 | SE    | T-30+N | SE    |
| Levin soil |                                 |       |      |       |        |       |                               |       |      |       |        |       |                               |       |      |       |        |       |
| 1          | 0.4                             | 0.007 | 0.4  | 0.012 | 0.4    | 0.003 | 0.5                           | 0.022 | 0.5  | 0.015 | 0.5    | 0.015 | 0.4                           | 0.016 | 0.5  | 0.012 | 0.4    | 0.009 |
| 5          | 0.3                             | 0.004 | 0.3  | 0.018 | 0.3    | 0.014 | 0.3                           | 0.005 | 0.3  | 0.026 | 0.4    | 0.019 | 0.3                           | 0.011 | 0.3  | 0.024 | 0.4    | 0.019 |
| 9          | 0.2                             | 0.006 | 0.3  | 0.004 | 0.3    | 0.010 | 0.2                           | 0.011 | 0.2  | 0.006 | 0.3    | 0.006 | 0.2                           | 0.002 | 0.3  | 0.010 | 0.3    | 0.038 |
| 13         | 0.8                             | 0.131 | 1.5  | 0.464 | 1.2    | 0.088 | 1.4                           | 0.059 | 1.4  | 0.182 | 1.4    | 0.199 | 1.4                           | 0.059 | 1.4  | 0.159 | 1.3    | 0.209 |
| 21         | 1.1                             | 0.413 | 0.5  | 0.009 | 0.4    | 0.020 | 0.5                           | 0.028 | 0.7  | 0.028 | 0.9    | 0.299 | 0.7                           | 0.190 | 0.4  | 0.079 | 0.9    | 0.072 |
| 31         | 1.2                             | 0.174 | 0.8  | 0.059 | 1.3    | 0.274 | 2.0                           | 0.235 | 1.4  | 0.427 | 0.8    | 0.278 | 1.6                           | 0.167 | 1.1  | 0.139 | 1.4    | 0.177 |
| 49         | 0.4                             | 0.058 | 0.7  | 0.043 | 0.6    | 0.089 | 0.5                           | 0.055 | 0.5  | 0.060 | 0.6    | 0.030 | 0.4                           | 0.092 | 0.7  | 0.182 | 0.7    | 0.105 |
| Week       | Pukekohe soil                   |       |      |       |        |       |                               |       |      |       |        |       |                               |       |      |       |        |       |
| 1          | 0.4                             | 0.022 | 0.4  | 0.021 | 0.4    | 0.030 | 0.5                           | 0.043 | 0.4  | 0.029 | 0.5    | 0.030 | 0.5                           | 0.052 | 0.5  | 0.036 | 0.6    | 0.050 |
| 5          | 0.3                             | 0.021 | 0.4  | 0.011 | 0.4    | 0.013 | 0.4                           | 0.026 | 0.4  | 0.021 | 0.7    | 0.237 | 0.5                           | 0.029 | 0.5  | 0.017 | 0.5    | 0.028 |
| 9          | 0.2                             | 0.022 | 0.2  | 0.004 | 0.3    | 0.022 | 0.2                           | 0.058 | 0.3  | 0.033 | 0.2    | 0.040 | 0.3                           | 0.011 | 0.3  | 0.012 | 0.4    | 0.015 |
| 13         | 0.9                             | 0.166 | 0.9  | 0.129 | 1.1    | 0.058 | 0.8                           | 0.109 | 1.7  | 0.172 | 1.5    | 0.200 | 1.2                           | 0.261 | 1.3  | 0.215 | 1.6    | 0.273 |
| 21         | 0.8                             | 0.157 | 0.7  | 0.074 | 1.0    | 0.224 | 0.7                           | 0.312 | 0.7  | 0.078 | 1.7    | 0.404 | 1.3                           | 0.296 | 1.1  | 0.210 | 0.9    | 0.147 |
| 31         | 1.4                             | 0.469 | 1.1  | 0.207 | 1.2    | 0.255 | 2.3                           | 0.393 | 1.1  | 0.166 | 1.2    | 0.271 | 1.7                           | 0.208 | 1.4  | 0.193 | 1.2    | 0.340 |
| 49         | 0.9                             | 0.283 | 1.3  | 0.469 | 0.8    | 0.085 | 1.0                           | 0.321 | 0.8  | 0.029 | 1.2    | 0.096 | 0.8                           | 0.117 | 0.8  | 0.152 | 0.8    | 0.069 |

Table S3 Extractable Cu (mg/kg) over time (week) in Levin soil and Pukekohe with and without composts. SE is the standard error of the mean (n=3).

| Extractable Cu (mg/kg) |                                 |       |      |       |        |       |                               |       |      |       |        |       |                               |       |      |       |        |       |
|------------------------|---------------------------------|-------|------|-------|--------|-------|-------------------------------|-------|------|-------|--------|-------|-------------------------------|-------|------|-------|--------|-------|
| Week                   | Municipal compost amended soils |       |      |       |        |       | Sawdust compost amended soils |       |      |       |        |       | No organic matter added soils |       |      |       |        |       |
|                        | T-19                            | SE    | T-30 | SE    | T3-0+N | SE    | T-19                          | SE    | T-30 | SE    | T-30+N | SE    | T-19                          | SE    | T-30 | SE    | T-30+N | SE    |
| Levin soil             |                                 |       |      |       |        |       |                               |       |      |       |        |       |                               |       |      |       |        |       |
| 1                      | 0.2                             | 0.012 | 0.2  | 0.006 | 0.2    | 0.010 | 0.2                           | 0.025 | 0.2  | 0.011 | 0.2    | 0.004 | 0.2                           | 0.035 | 0.2  | 0.008 | 0.2    | 0.007 |
| 5                      | 0.1                             | 0.001 | 0.1  | 0.003 | 0.1    | 0.000 | 0.1                           | 0.004 | 0.1  | 0.003 | 0.1    | 0.003 | 0.1                           | 0.004 | 0.1  | 0.005 | 0.1    | 0.006 |
| 9                      | 0.1                             | 0.002 | 0.1  | 0.001 | 0.1    | 0.002 | 0.1                           | 0.006 | 0.1  | 0.001 | 0.1    | 0.003 | 0.1                           | 0.003 | 0.1  | 0.005 | 0.1    | 0.002 |
| 13                     | 0.1                             | 0.003 | 0.1  | 0.001 | 0.1    | 0.005 | 0.1                           | 0.012 | 0.1  | 0.001 | 0.1    | 0.002 | 0.1                           | 0.012 | 0.1  | 0.002 | 0.1    | 0.005 |
| 21                     | 0.1                             | 0.008 | 0.1  | 0.015 | 0.1    | 0.012 | 0.1                           | 0.000 | 0.1  | 0.009 | 0.1    | 0.009 | 0.1                           | 0.010 | 0.1  | 0.014 | 0.1    | 0.014 |
| 31                     | 0.1                             | 0.006 | 0.0  | 0.011 | 0.1    | 0.008 | 0.1                           | 0.003 | 0.0  | 0.003 | 0.0    | 0.011 | 0.1                           | 0.011 | 0.0  | 0.009 | 0.0    | 0.013 |
| 49                     | 0.1                             | 0.004 | 0.0  | 0.011 | 0.1    | 0.014 | 0.1                           | 0.012 | 0.0  | 0.007 | 0.1    | 0.009 | 0.0                           | 0.013 | 0.1  | 0.001 | 0.1    | 0.005 |
| Pukekohe soil          |                                 |       |      |       |        |       |                               |       |      |       |        |       |                               |       |      |       |        |       |
| 1                      | 0.2                             | 0.008 | 0.1  | 0.007 | 0.2    | 0.006 | 0.2                           | 0.011 | 0.2  | 0.013 | 0.2    | 0.003 | 0.2                           | 0.020 | 0.1  | 0.003 | 0.2    | 0.014 |
| 5                      | 0.1                             | 0.002 | 0.1  | 0.003 | 0.1    | 0.002 | 0.1                           | 0.003 | 0.1  | 0.006 | 0.1    | 0.015 | 0.1                           | 0.011 | 0.1  | 0.006 | 0.1    | 0.004 |
| 9                      | 0.1                             | 0.001 | 0.1  | 0.004 | 0.1    | 0.006 | 0.1                           | 0.005 | 0.1  | 0.015 | 0.1    | 0.001 | 0.1                           | 0.006 | 0.1  | 0.010 | 0.1    | 0.003 |
| 13                     | 0.1                             | 0.009 | 0.1  | 0.003 | 0.1    | 0.003 | 0.1                           | 0.003 | 0.1  | 0.001 | 0.1    | 0.001 | 0.1                           | 0.003 | 0.1  | 0.002 | 0.1    | 0.009 |
| 21                     | 0.1                             | 0.009 | 0.1  | 0.009 | 0.1    | 0.010 | 0.1                           | 0.003 | 0.1  | 0.007 | 0.1    | 0.008 | 0.1                           | 0.009 | 0.1  | 0.010 | 0.1    | 0.016 |
| 31                     | 0.1                             | 0.002 | 0.0  | 0.016 | 0.1    | 0.001 | 0.0                           | 0.007 | 0.0  | 0.005 | 0.1    | 0.004 | 0.1                           | 0.007 | 0.0  | 0.009 | 0.1    | 0.013 |
| 49                     | 0.0                             | 0.008 | 0.1  | 0.003 | 0.0    | 0.015 | 0.1                           | 0.007 | 0.0  | 0.005 | 0.0    | 0.007 | 0.1                           | 0.013 | 0.0  | 0.011 | 0.1    | 0.012 |

Table S4 Extractable Fe (mg/kg) over time (week) in Levin soil and Pukekohe with and without composts. SE is the standard error of the mean (n=3).

| Week       | Extractable Fe (mg/kg)          |       |      |       |        |       |                               |       |      |       |        |       |                               |       |      |       |        |       |
|------------|---------------------------------|-------|------|-------|--------|-------|-------------------------------|-------|------|-------|--------|-------|-------------------------------|-------|------|-------|--------|-------|
|            | Municipal compost amended soils |       |      |       |        |       | Sawdust compost amended soils |       |      |       |        |       | No organic matter added soils |       |      |       |        |       |
|            | T-19                            | SE    | T-30 | SE    | T3-0+N | SE    | T-19                          | SE    | T-30 | SE    | T-30+N | SE    | T-19                          | SE    | T-30 | SE    | T-30+N | SE    |
| Levin soil |                                 |       |      |       |        |       |                               |       |      |       |        |       |                               |       |      |       |        |       |
| 1          | 0.2                             | 0.012 | 0.2  | 0.006 | 0.2    | 0.006 | 0.2                           | 0.012 | 0.2  | 0.004 | 0.2    | 0.006 | 0.2                           | 0.024 | 0.2  | 0.007 | 0.2    | 0.009 |
| 5          | 0.1                             | 0.002 | 0.2  | 0.009 | 0.2    | 0.007 | 0.2                           | 0.005 | 0.2  | 0.015 | 0.2    | 0.009 | 0.1                           | 0.003 | 0.2  | 0.004 | 0.2    | 0.015 |
| 9          | 0.1                             | 0.002 | 0.1  | 0.001 | 0.1    | 0.008 | 0.1                           | 0.007 | 0.1  | 0.002 | 0.1    | 0.002 | 0.1                           | 0.004 | 0.1  | 0.008 | 0.1    | 0.010 |
| 13         | 0.4                             | 0.041 | 0.7  | 0.235 | 0.5    | 0.036 | 0.6                           | 0.035 | 0.7  | 0.087 | 0.6    | 0.118 | 0.6                           | 0.035 | 0.7  | 0.116 | 0.6    | 0.096 |
| 21         | 0.9                             | 0.153 | 0.6  | 0.046 | 0.5    | 0.040 | 0.6                           | 0.013 | 0.6  | 0.036 | 0.7    | 0.135 | 0.7                           | 0.085 | 0.5  | 0.051 | 0.6    | 0.051 |
| 31         | 0.9                             | 0.107 | 0.7  | 0.050 | 1.0    | 0.122 | 1.3                           | 0.111 | 0.9  | 0.222 | 0.7    | 0.144 | 1.0                           | 0.129 | 0.7  | 0.099 | 0.9    | 0.064 |
| 49         | 0.6                             | 0.043 | 0.7  | 0.045 | 0.7    | 0.075 | 0.6                           | 0.076 | 0.5  | 0.050 | 0.7    | 0.027 | 0.5                           | 0.077 | 0.7  | 0.062 | 0.7    | 0.033 |
| Week       | Pukekohe soil                   |       |      |       |        |       |                               |       |      |       |        |       |                               |       |      |       |        |       |
| 1          | 0.1                             | 0.008 | 0.1  | 0.014 | 0.2    | 0.008 | 0.1                           | 0.015 | 0.2  | 0.027 | 0.2    | 0.005 | 0.1                           | 0.007 | 0.1  | 0.017 | 0.2    | 0.018 |
| 5          | 0.1                             | 0.009 | 0.2  | 0.010 | 0.1    | 0.009 | 0.1                           | 0.010 | 0.2  | 0.012 | 0.3    | 0.101 | 0.2                           | 0.016 | 0.1  | 0.010 | 0.2    | 0.005 |
| 9          | 0.1                             | 0.003 | 0.1  | 0.001 | 0.1    | 0.006 | 0.0                           | 0.005 | 0.1  | 0.022 | 0.1    | 0.003 | 0.1                           | 0.004 | 0.1  | 0.001 | 0.1    | 0.002 |
| 13         | 0.4                             | 0.076 | 0.4  | 0.056 | 0.4    | 0.020 | 0.3                           | 0.037 | 0.6  | 0.071 | 0.6    | 0.098 | 0.5                           | 0.097 | 0.5  | 0.080 | 0.5    | 0.097 |
| 21         | 0.7                             | 0.044 | 0.7  | 0.036 | 0.7    | 0.045 | 0.6                           | 0.071 | 0.6  | 0.049 | 0.9    | 0.104 | 0.8                           | 0.071 | 0.7  | 0.050 | 0.6    | 0.007 |
| 31         | 0.9                             | 0.145 | 0.8  | 0.105 | 0.9    | 0.070 | 1.1                           | 0.136 | 0.8  | 0.055 | 0.8    | 0.079 | 1.0                           | 0.081 | 0.9  | 0.086 | 0.8    | 0.081 |
| 49         | 0.7                             | 0.048 | 0.9  | 0.165 | 0.7    | 0.059 | 0.8                           | 0.126 | 0.6  | 0.018 | 0.7    | 0.056 | 0.7                           | 0.075 | 0.6  | 0.081 | 0.6    | 0.032 |

Table S5 Extractable K (mg/kg) over time (week) in Levin soil and Pukekohe with and without composts. SE is the standard error of the mean (n=3).

| Extractable K (mg/kg) |                                 |    |      |    |        |    |                               |    |      |    |        |    |                               |    |      |    |        |    |
|-----------------------|---------------------------------|----|------|----|--------|----|-------------------------------|----|------|----|--------|----|-------------------------------|----|------|----|--------|----|
| Week                  | Municipal compost amended soils |    |      |    |        |    | Sawdust compost amended soils |    |      |    |        |    | No organic matter added soils |    |      |    |        |    |
|                       | T-19                            | SE | T-30 | SE | T3-0+N | SE | T-19                          | SE | T-30 | SE | T-30+N | SE | T-19                          | SE | T-30 | SE | T-30+N |    |
| Levin soil            |                                 |    |      |    |        |    |                               |    |      |    |        |    |                               |    |      |    |        |    |
| 1                     | 324                             | 33 | 308  | 10 | 344    | 10 | 217                           | 13 | 221  | 6  | 220    | 2  | 182                           | 3  | 180  | 3  | 179    | 1  |
| 5                     | 276                             | 2  | 268  | 2  | 269    | 3  | 204                           | 0  | 201  | 2  | 209    | 2  | 180                           | 2  | 176  | 1  | 180    | 1  |
| 9                     | 303                             | 1  | 297  | 1  | 263    | 34 | 195                           | 2  | 223  | 0  | 224    | 4  | 246                           | 3  | 229  | 33 | 191    | 1  |
| 13                    | 327                             | 4  | 325  | 2  | 332    | 7  | 194                           | 8  | 227  | 3  | 232    | 6  | 194                           | 8  | 189  | 3  | 202    | 3  |
| 21                    | 251                             | 22 | 282  | 46 | 235    | 43 | 219                           | 6  | 185  | 30 | 131    | 15 | 169                           | 17 | 174  | 27 | 133    | 28 |
| 31                    | 258                             | 36 | 249  | 51 | 283    | 32 | 242                           | 1  | 149  | 12 | 182    | 40 | 169                           | 31 | 107  | 23 | 137    | 35 |
| 49                    | 278                             | 26 | 254  | 37 | 277    | 57 | 183                           | 40 | 134  | 23 | 210    | 28 | 133                           | 32 | 196  | 2  | 188    | 12 |
| Week                  | Pukekohe soil (mg/kg)           |    |      |    |        |    |                               |    |      |    |        |    |                               |    |      |    |        |    |
| 1                     | 460                             | 16 | 419  | 9  | 396    | 5  | 330                           | 2  | 335  | 4  | 335    | 10 | 281                           | 2  | 281  | 1  | 277    | 0  |
| 5                     | 376                             | 1  | 380  | 3  | 401    | 2  | 305                           | 2  | 309  | 4  | 306    | 7  | 285                           | 3  | 284  | 1  | 303    | 2  |
| 9                     | 415                             | 1  | 412  | 1  | 416    | 2  | 342                           | 4  | 334  | 2  | 334    | 2  | 307                           | 1  | 308  | 1  | 315    | 1  |
| 13                    | 473                             | 2  | 478  | 4  | 481    | 1  | 390                           | 2  | 384  | 4  | 395    | 1  | 352                           | 3  | 349  | 2  | 361    | 2  |
| 21                    | 450                             | 12 | 412  | 43 | 396    | 40 | 274                           | 24 | 304  | 36 | 269    | 28 | 340                           | 20 | 272  | 50 | 268    | 47 |
| 31                    | 452                             | 4  | 319  | 71 | 467    | 2  | 216                           | 25 | 310  | 33 | 290    | 29 | 276                           | 37 | 274  | 38 | 252    | 55 |
| 49                    | 321                             | 52 | 436  | 14 | 337    | 61 | 346                           | 15 | 245  | 11 | 237    | 33 | 277                           | 52 | 242  | 53 | 299    | 52 |

Table S6 Extractable Mg (mg/kg) over time (week) in Levin soil and Pukekohe with and without composts. SE is the standard error of the mean (n=3).

| Week       | Extractable Mg (mg/kg)          |    |      |    |        |    |                               |    |      |    |        |    |                               |    |      |    |        |    |
|------------|---------------------------------|----|------|----|--------|----|-------------------------------|----|------|----|--------|----|-------------------------------|----|------|----|--------|----|
|            | Municipal compost amended soils |    |      |    |        |    | Sawdust compost amended soils |    |      |    |        |    | No organic matter added soils |    |      |    |        |    |
|            | T-19                            | SE | T-30 | SE | T3-0+N | SE | T-19                          | SE | T-30 | SE | T-30+N | SE | T-19                          | SE | T-30 | SE | T-30+N |    |
| Levin soil |                                 |    |      |    |        |    |                               |    |      |    |        |    |                               |    |      |    |        |    |
| 1          | 165                             | 4  | 164  | 1  | 166    | 1  | 151                           | 3  | 152  | 1  | 153    | 2  | 146                           | 1  | 145  | 0  | 143    | 1  |
| 5          | 172                             | 1  | 168  | 2  | 168    | 1  | 161                           | 1  | 154  | 1  | 160    | 3  | 146                           | 0  | 146  | 0  | 150    | 1  |
| 9          | 128                             | 1  | 126  | 1  | 121    | 5  | 113                           | 0  | 120  | 1  | 121    | 2  | 130                           | 2  | 113  | 5  | 108    | 2  |
| 13         | 262                             | 2  | 267  | 3  | 287    | 6  | 216                           | 6  | 241  | 3  | 261    | 6  | 216                           | 6  | 224  | 6  | 244    | 2  |
| 21         | 170                             | 12 | 183  | 20 | 170    | 19 | 173                           | 5  | 160  | 15 | 142    | 11 | 154                           | 13 | 167  | 19 | 143    | 23 |
| 31         | 166                             | 16 | 167  | 20 | 195    | 12 | 179                           | 1  | 138  | 8  | 163    | 24 | 159                           | 21 | 115  | 19 | 147    | 25 |
| 49         | 185                             | 9  | 171  | 15 | 190    | 26 | 156                           | 25 | 129  | 16 | 186    | 13 | 133                           | 24 | 177  | 1  | 181    | 5  |
| Week       | Pukekohe soil                   |    |      |    |        |    |                               |    |      |    |        |    |                               |    |      |    |        |    |
| 1          | 194                             | 1  | 190  | 1  | 187    | 1  | 184                           | 1  | 183  | 1  | 181    | 1  | 176                           | 1  | 178  | 2  | 175    | 1  |
| 5          | 191                             | 1  | 192  | 1  | 200    | 1  | 184                           | 1  | 186  | 1  | 186    | 2  | 176                           | 1  | 176  | 1  | 186    | 0  |
| 9          | 144                             | 1  | 149  | 1  | 150    | 1  | 141                           | 1  | 143  | 1  | 146    | 1  | 134                           | 1  | 137  | 1  | 138    | 0  |
| 13         | 358                             | 3  | 360  | 4  | 379    | 2  | 331                           | 1  | 330  | 6  | 342    | 2  | 313                           | 4  | 321  | 1  | 335    | 2  |
| 21         | 240                             | 5  | 234  | 20 | 230    | 17 | 182                           | 9  | 206  | 16 | 193    | 12 | 216                           | 11 | 195  | 23 | 196    | 22 |
| 31         | 245                             | 2  | 200  | 29 | 265    | 1  | 156                           | 9  | 212  | 18 | 202    | 13 | 194                           | 14 | 194  | 15 | 187    | 26 |
| 49         | 192                             | 22 | 244  | 6  | 206    | 23 | 217                           | 9  | 182  | 3  | 176    | 14 | 192                           | 23 | 182  | 23 | 213    | 23 |

Table S7 Extractable Mn (mg/kg) over time (week) in Levin soil and Pukekohe with and without composts. SE is the standard error of the mean (n=3).

| Week       | Extractable Mn (mg/kg)          |       |      |       |        |       |                               |       |      |       |        |       |                               |       |      |       |        |       |
|------------|---------------------------------|-------|------|-------|--------|-------|-------------------------------|-------|------|-------|--------|-------|-------------------------------|-------|------|-------|--------|-------|
|            | Municipal compost amended soils |       |      |       |        |       | Sawdust compost amended soils |       |      |       |        |       | No organic matter added soils |       |      |       |        |       |
|            | T-19                            | SE    | T-30 | SE    | T3-0+N | SE    | T-19                          | SE    | T-30 | SE    | T-30+N | SE    | T-19                          | SE    | T-30 | SE    | T-30+N |       |
| Levin soil |                                 |       |      |       |        |       |                               |       |      |       |        |       |                               |       |      |       |        |       |
| 1          | 5.0                             | 0.132 | 4.9  | 0.061 | 5.4    | 0.205 | 5.7                           | 0.298 | 5.5  | 0.062 | 5.9    | 0.212 | 5.2                           | 0.049 | 5.0  | 0.084 | 5.1    | 0.097 |
| 5          | 3.3                             | 0.089 | 3.2  | 0.014 | 3.2    | 0.083 | 3.3                           | 0.095 | 3.4  | 0.154 | 3.5    | 0.087 | 3.3                           | 0.028 | 3.4  | 0.089 | 3.5    | 0.127 |
| 9          | 5.0                             | 0.101 | 5.7  | 0.033 | 6.5    | 0.025 | 4.6                           | 0.225 | 5.1  | 0.236 | 6.0    | 0.269 | 5.3                           | 0.067 | 5.5  | 0.428 | 6.4    | 0.525 |
| 13         | 3.6                             | 0.018 | 3.4  | 0.241 | 5.0    | 0.262 | 3.4                           | 0.240 | 3.3  | 0.496 | 5.2    | 0.447 | 3.4                           | 0.240 | 3.2  | 0.125 | 4.9    | 0.191 |
| 21         | 4.5                             | 0.256 | 5.1  | 1.707 | 6.3    | 1.187 | 5.4                           | 0.135 | 3.8  | 0.593 | 4.7    | 0.664 | 5.2                           | 0.457 | 4.2  | 0.735 | 6.0    | 1.113 |
| 31         | 2.5                             | 0.276 | 1.9  | 0.330 | 2.9    | 0.433 | 3.5                           | 0.264 | 2.1  | 0.179 | 2.9    | 0.497 | 2.5                           | 0.138 | 1.5  | 0.291 | 2.4    | 0.457 |
| 49         | 1.6                             | 0.122 | 1.8  | 0.251 | 2.6    | 0.455 | 1.8                           | 0.406 | 1.5  | 0.244 | 3.1    | 0.333 | 1.4                           | 0.310 | 2.4  | 0.061 | 3.1    | 0.224 |
| Week       | Pukekohe soil                   |       |      |       |        |       |                               |       |      |       |        |       |                               |       |      |       |        |       |
| 1          | 19                              | 1     | 15   | 0     | 17     | 1     | 20                            | 1     | 16   | 0     | 19     | 1     | 25                            | 4     | 19   | 1     | 23     | 2     |
| 5          | 11                              | 0     | 12   | 0     | 13     | 0     | 11                            | 0     | 12   | 0     | 13     | 1     | 13                            | 1     | 15   | 0     | 17     | 0     |
| 9          | 25                              | 0     | 21   | 0     | 25     | 0     | 22                            | 1     | 20   | 1     | 20     | 1     | 25                            | 2     | 21   | 1     | 28     | 1     |
| 13         | 18                              | 0     | 14   | 0     | 18     | 1     | 16                            | 1     | 13   | 0     | 20     | 1     | 19                            | 1     | 16   | 1     | 22     | 0     |
| 21         | 38                              | 2     | 26   | 3     | 40     | 4     | 27                            | 1     | 22   | 2     | 39     | 5     | 44                            | 2     | 25   | 4     | 47     | 10    |
| 31         | 16                              | 0     | 11   | 3     | 19     | 0     | 9                             | 1     | 13   | 1     | 15     | 1     | 14                            | 1     | 14   | 2     | 18     | 4     |
| 49         | 7                               | 1     | 9    | 0     | 10     | 2     | 9                             | 0     | 7    | 0     | 10     | 1     | 9                             | 2     | 9    | 2     | 15     | 2     |

Table S8 Extractable Na (mg/kg) over time (week) in Levin soil and Pukekohe with and without composts. SE is the standard error of the mean (n=3).

| Week       | Extractable Na (mg/kg)          |    |      |    |        |    |                               |    |      |    |        |    |                               |    |      |    |        |    |
|------------|---------------------------------|----|------|----|--------|----|-------------------------------|----|------|----|--------|----|-------------------------------|----|------|----|--------|----|
|            | Municipal compost amended soils |    |      |    |        |    | Sawdust compost amended soils |    |      |    |        |    | No organic matter added soils |    |      |    |        |    |
|            | T-19                            | SE | T-30 | SE | T3-0+N | SE | T-19                          | SE | T-30 | SE | T-30+N | SE | T-19                          | SE | T-30 | SE | T-30+N |    |
| Levin soil |                                 |    |      |    |        |    |                               |    |      |    |        |    |                               |    |      |    |        |    |
| 1          | 113                             | 13 | 105  | 5  | 120    | 5  | 72                            | 5  | 73   | 3  | 73     | 0  | 54                            | 1  | 53   | 2  | 56     | 0  |
| 5          | 108                             | 2  | 100  | 4  | 101    | 2  | 71                            | 1  | 67   | 2  | 74     | 3  | 55                            | 2  | 53   | 1  | 58     | 2  |
| 9          | 76                              | 0  | 73   | 0  | 62     | 11 | 43                            | 0  | 52   | 1  | 53     | 2  | 61                            | 1  | 51   | 9  | 41     | 1  |
| 13         | 90                              | 1  | 92   | 1  | 90     | 1  | 45                            | 1  | 59   | 1  | 65     | 3  | 45                            | 1  | 49   | 2  | 48     | 1  |
| 21         | 57                              | 4  | 60   | 9  | 52     | 9  | 42                            | 2  | 35   | 5  | 27     | 3  | 30                            | 3  | 32   | 5  | 25     | 5  |
| 31         | 57                              | 8  | 55   | 10 | 62     | 7  | 47                            | 1  | 30   | 2  | 36     | 7  | 30                            | 5  | 21   | 4  | 26     | 7  |
| 49         | 61                              | 5  | 57   | 7  | 64     | 11 | 38                            | 7  | 29   | 4  | 45     | 5  | 24                            | 5  | 39   | 0  | 39     | 2  |
| Week       | Pukekohe soil                   |    |      |    |        |    |                               |    |      |    |        |    |                               |    |      |    |        |    |
| 1          | 168                             | 8  | 145  | 4  | 137    | 4  | 113                           | 3  | 113  | 3  | 114    | 4  | 92                            | 3  | 88   | 1  | 90     | 2  |
| 5          | 130                             | 1  | 128  | 2  | 136    | 1  | 98                            | 2  | 101  | 1  | 99     | 3  | 91                            | 2  | 92   | 1  | 98     | 2  |
| 9          | 96                              | 2  | 95   | 1  | 96     | 1  | 81                            | 1  | 76   | 1  | 76     | 1  | 69                            | 1  | 68   | 1  | 69     | 1  |
| 13         | 120                             | 4  | 111  | 2  | 115    | 2  | 98                            | 3  | 97   | 2  | 99     | 1  | 85                            | 1  | 89   | 1  | 87     | 1  |
| 21         | 77                              | 2  | 71   | 7  | 68     | 7  | 47                            | 4  | 55   | 7  | 47     | 5  | 63                            | 5  | 48   | 9  | 46     | 8  |
| 31         | 90                              | 1  | 64   | 13 | 96     | 2  | 46                            | 4  | 60   | 6  | 58     | 5  | 54                            | 7  | 55   | 4  | 50     | 10 |
| 49         | 66                              | 10 | 86   | 3  | 69     | 11 | 69                            | 3  | 52   | 2  | 50     | 7  | 55                            | 10 | 50   | 11 | 62     | 10 |



Table S9 Extractable P (mg/kg) over time (week) in Levin soil and Pukekohe with and without composts. SE is the standard error of the mean (n=3).

| Extractable P (mg/kg) |                                 |     |      |     |        |     |                               |     |      |     |        |     |                               |     |      |     |        |     |
|-----------------------|---------------------------------|-----|------|-----|--------|-----|-------------------------------|-----|------|-----|--------|-----|-------------------------------|-----|------|-----|--------|-----|
| Week                  | Municipal compost amended soils |     |      |     |        |     | Sawdust compost amended soils |     |      |     |        |     | No organic matter added soils |     |      |     |        |     |
|                       | T-19                            | SE  | T-30 | SE  | T3-0+N | SE  | T-19                          | SE  | T-30 | SE  | T-30+N | SE  | T-19                          | SE  | T-30 | SE  | T-30+N |     |
| Levin soil            |                                 |     |      |     |        |     |                               |     |      |     |        |     |                               |     |      |     |        |     |
| 1                     | 7.3                             | 0.2 | 7.0  | 0.1 | 7.4    | 0.2 | 7.0                           | 0.4 | 6.9  | 0.1 | 7.0    | 0.0 | 6.6                           | 0.0 | 6.6  | 0.0 | 6.6    | 0.1 |
| 5                     | 6.7                             | 0.1 | 6.8  | 0.0 | 6.9    | 0.1 | 6.2                           | 0.0 | 6.4  | 0.1 | 6.7    | 0.0 | 6.3                           | 0.0 | 6.6  | 0.1 | 6.7    | 0.1 |
| 9                     | 6.1                             | 0.1 | 6.9  | 0.0 | 7.0    | 0.2 | 5.8                           | 0.2 | 6.0  | 0.1 | 6.4    | 0.1 | 5.6                           | 0.0 | 6.6  | 0.3 | 6.6    | 0.1 |
| 13                    | 6.3                             | 0.0 | 6.7  | 0.1 | 7.2    | 0.2 | 5.7                           | 0.1 | 6.0  | 0.1 | 6.8    | 0.0 | 5.7                           | 0.1 | 6.3  | 0.2 | 6.7    | 0.2 |
| 21                    | 5.5                             | 0.3 | 5.3  | 0.8 | 5.4    | 1.0 | 6.4                           | 0.1 | 4.7  | 0.7 | 4.0    | 0.5 | 5.8                           | 0.6 | 4.8  | 0.8 | 4.7    | 0.9 |
| 31                    | 5.3                             | 0.7 | 5.2  | 1.0 | 6.0    | 0.7 | 6.5                           | 0.2 | 4.3  | 0.4 | 5.2    | 1.0 | 5.1                           | 0.7 | 3.3  | 0.7 | 4.2    | 0.9 |
| 49                    | 5.2                             | 0.4 | 5.4  | 0.7 | 6.2    | 1.2 | 4.5                           | 0.9 | 3.8  | 0.7 | 6.3    | 0.8 | 3.9                           | 0.8 | 6.0  | 0.1 | 6.2    | 0.3 |
| Week                  | Pukekohe soil                   |     |      |     |        |     |                               |     |      |     |        |     |                               |     |      |     |        |     |
| 1                     | 4.0                             | 0.1 | 3.6  | 0.0 | 3.8    | 0.1 | 3.8                           | 0.2 | 3.6  | 0.0 | 4.1    | 0.1 | 3.6                           | 0.3 | 3.3  | 0.1 | 3.7    | 0.2 |
| 5                     | 3.1                             | 0.0 | 3.5  | 0.1 | 3.5    | 0.0 | 3.0                           | 0.0 | 3.3  | 0.1 | 3.3    | 0.2 | 2.9                           | 0.0 | 3.1  | 0.1 | 3.1    | 0.0 |
| 9                     | 2.9                             | 0.3 | 3.1  | 0.1 | 3.3    | 0.0 | 2.9                           | 0.2 | 3.0  | 0.1 | 3.0    | 0.3 | 2.8                           | 0.1 | 2.7  | 0.1 | 2.8    | 0.1 |
| 13                    | 3.1                             | 0.1 | 3.2  | 0.1 | 3.3    | 0.2 | 3.1                           | 0.0 | 3.0  | 0.1 | 3.3    | 0.0 | 2.8                           | 0.1 | 2.9  | 0.1 | 2.9    | 0.1 |
| 21                    | 3.3                             | 0.2 | 2.4  | 0.3 | 2.5    | 0.3 | 2.5                           | 0.2 | 2.3  | 0.3 | 2.0    | 0.2 | 3.2                           | 0.2 | 1.9  | 0.3 | 2.1    | 0.4 |
| 31                    | 3.1                             | 0.1 | 2.0  | 0.5 | 3.0    | 0.0 | 1.7                           | 0.1 | 2.4  | 0.3 | 2.3    | 0.2 | 2.1                           | 0.3 | 2.0  | 0.3 | 1.9    | 0.4 |
| 49                    | 1.9                             | 0.4 | 2.7  | 0.1 | 2.0    | 0.4 | 2.6                           | 0.1 | 1.8  | 0.1 | 1.8    | 0.3 | 2.0                           | 0.4 | 1.7  | 0.4 | 2.2    | 0.4 |

Table S10 Extractable S (mg/kg) over time (week) in Levin soil and Pukekohe with and without composts. SE is the standard error of the mean (n=3).

| Week | Extractable S (mg/kg)           |     |      |     |        |     |                               |     |      |     |        |     |                               |     |      |     |        |     |
|------|---------------------------------|-----|------|-----|--------|-----|-------------------------------|-----|------|-----|--------|-----|-------------------------------|-----|------|-----|--------|-----|
|      | Municipal compost amended soils |     |      |     |        |     | Sawdust compost amended soils |     |      |     |        |     | No organic matter added soils |     |      |     |        |     |
|      | T-19                            | SE  | T-30 | SE  | T3-0+N | SE  | T-19                          | SE  | T-30 | SE  | T-30+N | SE  | T-19                          | SE  | T-30 | SE  | T-30+N |     |
|      | Levin soil                      |     |      |     |        |     |                               |     |      |     |        |     |                               |     |      |     |        |     |
| 1    | 31.6                            | 3.7 | 28.1 | 0.8 | 32.6   | 1.6 | 37.2                          | 3.7 | 36.4 | 2.4 | 39.0   | 1.9 | 22.8                          | 0.7 | 20.8 | 0.3 | 21.8   | 0.4 |
| 5    | 30.1                            | 0.8 | 31.2 | 1.3 | 30.3   | 0.2 | 34.6                          | 1.0 | 37.6 | 1.6 | 39.0   | 1.6 | 19.3                          | 0.4 | 21.1 | 0.6 | 21.5   | 0.3 |
| 9    | 22.7                            | 0.2 | 28.0 | 0.2 | 22.5   | 3.2 | 14.6                          | 0.6 | 32.5 | 0.8 | 30.8   | 1.0 | 31.7                          | 1.2 | 20.5 | 2.0 | 17.2   | 0.3 |
| 13   | 23.8                            | 0.4 | 29.3 | 0.7 | 29.1   | 0.3 | 15.9                          | 0.9 | 34.1 | 0.8 | 35.6   | 0.6 | 15.9                          | 0.9 | 19.9 | 0.5 | 18.5   | 0.4 |
| 21   | 21.8                            | 2.1 | 26.1 | 5.1 | 24.2   | 4.9 | 34.2                          | 0.8 | 29.4 | 4.7 | 22.7   | 2.2 | 18.7                          | 2.0 | 17.4 | 3.4 | 15.7   | 3.8 |
| 31   | 20.1                            | 3.1 | 24.2 | 5.1 | 27.2   | 4.2 | 32.2                          | 0.7 | 25.1 | 2.3 | 27.8   | 6.2 | 12.6                          | 2.0 | 10.6 | 3.0 | 12.1   | 3.6 |
| 49   | 22.2                            | 2.3 | 27.7 | 3.9 | 29.1   | 6.7 | 25.9                          | 6.4 | 24.9 | 4.7 | 37.6   | 5.0 | 10.4                          | 3.1 | 24.9 | 1.5 | 19.5   | 1.4 |
| Week | Pukekohe soil                   |     |      |     |        |     |                               |     |      |     |        |     |                               |     |      |     |        |     |
| 1    | 60.7                            | 1.7 | 53.6 | 0.4 | 56.5   | 1.9 | 68.1                          | 3.3 | 69.3 | 2.0 | 75.6   | 1.6 | 54.3                          | 4.8 | 50.7 | 1.8 | 55.7   | 3.8 |
| 5    | 46.4                            | 0.1 | 50.6 | 0.9 | 50.0   | 0.3 | 51.8                          | 0.9 | 55.2 | 1.1 | 55.3   | 1.5 | 43.5                          | 1.0 | 46.6 | 0.9 | 46.2   | 0.1 |
| 9    | 47.3                            | 0.9 | 45.3 | 0.4 | 44.5   | 0.2 | 49.1                          | 0.9 | 49.8 | 1.0 | 49.1   | 0.4 | 39.2                          | 1.3 | 36.8 | 1.0 | 37.9   | 0.5 |
| 13   | 45.9                            | 1.0 | 50.4 | 0.4 | 48.4   | 0.6 | 51.9                          | 0.9 | 55.7 | 0.6 | 57.5   | 0.6 | 40.2                          | 0.8 | 41.5 | 0.5 | 41.2   | 0.2 |
| 21   | 57.6                            | 1.6 | 44.1 | 5.4 | 46.2   | 6.2 | 44.8                          | 3.0 | 46.3 | 6.3 | 42.3   | 3.9 | 52.0                          | 2.9 | 31.3 | 5.9 | 35.2   | 6.8 |
| 31   | 46.2                            | 0.7 | 34.7 | 9.2 | 52.0   | 0.4 | 28.6                          | 3.1 | 48.4 | 5.9 | 43.2   | 4.4 | 30.7                          | 4.3 | 32.0 | 4.8 | 29.3   | 6.8 |
| 49   | 30.8                            | 6.0 | 51.3 | 2.0 | 33.8   | 7.2 | 48.3                          | 2.5 | 38.3 | 2.0 | 35.0   | 5.3 | 30.1                          | 6.3 | 29.1 | 7.1 | 34.5   | 6.5 |

Table S11 Extractable Zn (mg/kg) over time (week) in Levin soil and Pukekohe with and without composts. SE is the standard error of the mean (n=3).

| Week       | Extractable Zn (mg/kg)          |      |       |      |        |      |                               |      |       |      |        |      |                               |      |       |      |        |      |
|------------|---------------------------------|------|-------|------|--------|------|-------------------------------|------|-------|------|--------|------|-------------------------------|------|-------|------|--------|------|
|            | Municipal compost amended soils |      |       |      |        |      | Sawdust compost amended soils |      |       |      |        |      | No organic matter added soils |      |       |      |        |      |
|            | T-19                            | SE   | T-30  | SE   | T3-0+N | SE   | T-19                          | SE   | T-30  | SE   | T-30+N | SE   | T-19                          | SE   | T-30  | SE   | T-30+N |      |
| Levin soil |                                 |      |       |      |        |      |                               |      |       |      |        |      |                               |      |       |      |        |      |
| 1          | 0.258                           | 0.01 | 0.151 | 0.01 | 0.178  | 0.02 | 0.179                         | 0.04 | 0.183 | 0.03 | 0.099  | 0.01 | 0.149                         | 0.03 | 0.018 | 0.00 | 0.165  | 0.02 |
| 5          | 0.065                           | 0.00 | 0.069 | 0.01 | 0.071  | 0.00 | 0.052                         | 0.00 | 0.064 | 0.01 | 0.060  | 0.00 | 0.066                         | 0.00 | 0.013 | 0.00 | 0.060  | 0.01 |
| 9          | 0.066                           | 0.01 | 0.069 | 0.00 | 0.090  | 0.00 | 0.061                         | 0.01 | 0.052 | 0.01 | 0.900  | 0.00 | 0.012                         | 0.00 | 0.026 | 0.00 | 0.090  | 0.00 |
| 13         | 0.161                           | 0.05 | 0.178 | 0.02 | 0.305  | 0.05 | 0.172                         | 0.05 | 0.244 | 0.06 | 0.143  | 0.03 | 0.156                         | 0.02 | 0.016 | 0.00 | 0.272  | 0.06 |
| 21         | 0.130                           | 0.06 | 0.150 | 0.00 | 0.059  | 0.00 | 0.109                         | 0.02 | 0.100 | 0.05 | 0.006  | 0.00 | 0.133                         | 0.10 | 0.009 | 0.00 | 0.041  | 0.03 |
| 31         | 0.277                           | 0.12 | 0.129 | 0.03 | 0.062  | 0.02 | 0.254                         | 0.06 | 0.151 | 0.06 | 0.038  | 0.02 | 0.050                         | 0.00 | 0.005 | 0.00 | 0.030  | 0.01 |
| 49         | 0.038                           | 0.01 | 0.008 | 0.00 | 0.010  | 0.00 | 0.002                         | 0.00 | 0.015 | 0.00 | 0.060  | 0.00 | 0.022                         | 0.01 | 0.012 | 0.00 | 0.026  | 0.01 |
| Week       | Pukekohe soil                   |      |       |      |        |      |                               |      |       |      |        |      |                               |      |       |      |        |      |
| 1          | 0.31                            | 0.01 | 0.25  | 0.01 | 0.30   | 0.01 | 0.32                          | 0.01 | 0.29  | 0.05 | 0.26   | 0.01 | 0.37                          | 0.04 | 0.31  | 0.02 | 0.34   | 0.02 |
| 5          | 0.24                            | 0.00 | 0.24  | 0.01 | 0.30   | 0.01 | 0.21                          | 0.01 | 0.23  | 0.02 | 0.27   | 0.03 | 0.29                          | 0.03 | 0.28  | 0.02 | 0.32   | 0.01 |
| 9          | 0.23                            | 0.00 | 0.29  | 0.02 | 0.37   | 0.01 | 0.25                          | 0.06 | 0.24  | 0.03 | 0.25   | 0.03 | 0.26                          | 0.01 | 0.26  | 0.01 | 0.37   | 0.00 |
| 13         | 0.56                            | 0.03 | 0.54  | 0.02 | 0.80   | 0.14 | 0.44                          | 0.03 | 0.45  | 0.01 | 0.48   | 0.03 | 0.49                          | 0.05 | 0.65  | 0.07 | 0.63   | 0.05 |
| 21         | 0.33                            | 0.03 | 0.29  | 0.05 | 0.54   | 0.16 | 0.28                          | 0.06 | 0.21  | 0.04 | 0.29   | 0.06 | 0.36                          | 0.01 | 0.30  | 0.03 | 0.31   | 0.06 |
| 31         | 0.42                            | 0.02 | 0.26  | 0.07 | 0.51   | 0.04 | 0.17                          | 0.02 | 0.32  | 0.01 | 0.31   | 0.04 | 0.31                          | 0.04 | 0.34  | 0.07 | 0.37   | 0.05 |
| 49         | 0.17                            | 0.03 | 0.26  | 0.01 | 0.32   | 0.08 | 0.20                          | 0.03 | 0.15  | 0.02 | 0.21   | 0.03 | 0.19                          | 0.05 | 0.17  | 0.05 | 0.40   | 0.08 |

Table S12 Fisher’s post hoc test of the data used in Figure 1 (A-F). Values with the same capital letters in the rows are not significantly different. Values with the same lower-case letters in the columns are not significantly different. The “\*” indicates no significant difference.

| Treatment | Week |      |     |     |     |     |      |
|-----------|------|------|-----|-----|-----|-----|------|
| Figure 1A | 1*   | 5    | 9*  | 13* | 21* | 31* | 49   |
| T-19      | A    | Aa   | A   | AB  | BC  | BC  | Ca   |
| T-30      | A    | Ab   | A   | AB  | AB  | BC  | Cb   |
| T-30+N    | A    | Ac   | A   | B   | B   | B   | Bc   |
| Figure 1B | Week |      |     |     |     |     |      |
|           | 1*   | 5    | 9*  | 13* | 21* | 31* | 49   |
| T-19      | A    | Ba   | B   | B   | B   | B   | Ba   |
| T-30      | BC   | ABab | A   | D   | D   | CD  | Db   |
| T-30+N    | AB   | Bb   | A   | C   | C   | C   | Cb   |
| Figure 1C | Week |      |     |     |     |     |      |
|           | 1*   | 5*   | 9   | 13* | 21  | 31  | 49   |
| T-19      | B    | BC   | Aa  | CD  | Da  | Da  | Da   |
| T-30      | BC   | AB   | Ab  | CD  | Db  | Dab | Db   |
| T-30+N    | AB   | B    | Aab | C   | Cab | Cb  | Cab  |
| Figure 1D | Week |      |     |     |     |     |      |
|           | 1    | 5*   | 9   | 13  | 21  | 31  | 49*  |
| T-19      | BCb  | AB   | Aa  | ABa | Aba | BCa | C    |
| T-30      | Aa   | AB   | Aab | Cb  | BCa | Dab | D    |
| T-30+N    | Aab  | A    | Ab  | ABb | BCb | CDb | D    |
| Figure 1E | Week |      |     |     |     |     |      |
|           | 1    | 5*   | 9*  | 13  | 21  | 31  | 49   |
| T-19      | ABa  | B    | A   | Ca  | Ca  | Ca  | Ca   |
| T-30      | Cb   | B    | A   | CDb | Dc  | CDb | CDab |
| T-30+N    | Bab  | B    | A   | Cb  | CDb | Dc  | Db   |
| Figure 1F | Week |      |     |     |     |     |      |
|           | 1*   | 5*   | 9*  | 13* | 21* | 31* | 49*  |
| T-19      | AB   | BC   | A   | D   | D   | CD  | D    |
| T-30      | A    | B    | B   | C   | C   | C   | C    |
| T-30+N    | A    | B    | A   | C   | C   | C   | C    |

Table S13 Fisher’s post hoc test of the data used in Figure 2 (A-F). Values with the same capital letters in the rows are not significantly different. Values with the same lower-case letters in the columns are not significantly different. The “\*” indicates no significant difference.

| Treatment | Week |      |     |      |     |      |      |
|-----------|------|------|-----|------|-----|------|------|
| Figure 2A | 1*   | 5    | 9   | 13   | 21* | 31   | 49*  |
| T-19      | BC   | Aa   | Bb  | B    | CD  | CD   | Db   |
| T-30      | B    | CDb  | Ab  | BC   | DE  | E    | CDab |
| T-30+N    | BC   | CDEb | Aa  | B    | DE  | E    | BCDa |
|           |      |      |     |      |     |      |      |
| Figure 2B | Week |      |     |      |     |      |      |
|           | 1*   | 5    | 9   | 13   | 21* | 31   | 49*  |
| T-19      | B    | Aa   | Bb  | Cc   | C   | Cb   | C    |
| T-30      | B    | Bb   | Ab  | CDb  | C   | Db   | CD   |
| T-30+N    | B    | Bb   | Aa  | Ba   | B   | Ba   | B    |
|           |      |      |     |      |     |      |      |
| Figure 2C | Week |      |     |      |     |      |      |
|           | 1    | 5*   | 9   | 13   | 21* | 31*  | 49*  |
| T-19      | BCa  | A    | Bb  | Cb   | BC  | BC   | BC   |
| T-30      | ABa  | A    | ABb | ABab | B   | B    | B    |
| T-30+N    | Bb   | AB   | Aa  | Ba   | B   | B    | B    |
|           |      |      |     |      |     |      |      |
| Figure 2D | Week |      |     |      |     |      |      |
|           | 1*   | 5    | 9   | 13   | 21* | 31*  | 49*  |
| T-19      | B    | BCb  | Ab  | Dc   | B   | CD   | D    |
| T-30      | B    | Bb   | Ab  | Bb   | BC  | BC   | C    |
| T-30+N    | BC   | BCa  | Aa  | Ba   | C   | C    | BC   |
|           |      |      |     |      |     |      |      |
| Figure 2E | Week |      |     |      |     |      |      |
|           | 1*   | 5    | 9   | 13*  | 21* | 31   | 49*  |
| T-19      | AB   | Bb   | Ab  | B    | AB  | ABab | B    |
| T-30      | BC   | BCb  | Ab  | B    | BC  | Cb   | BC   |
| T-30+N    | D    | CDa  | Aa  | B    | BCD | BCa  | D    |
|           |      |      |     |      |     |      |      |
| Figure 2F | Week |      |     |      |     |      |      |
|           | 1*   | 5*   | 9   | 13   | 21* | 31   | 49*  |
| T-19      | B    | BC   | Ab  | CDb  | BCD | Db   | BCD  |
| T-30      | CD   | BC   | Ab  | ABa  | CD  | CDab | D    |
| T-30+N    | BC   | B    | Aa  | Aa   | BC  | BCa  | C    |
